# Supplementary material
Source: PubMed Central journal article supplement (PMC3770952)

**Figure 1B**

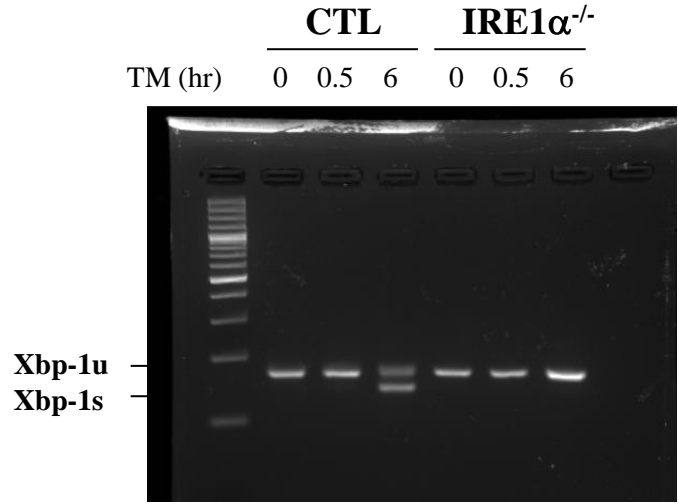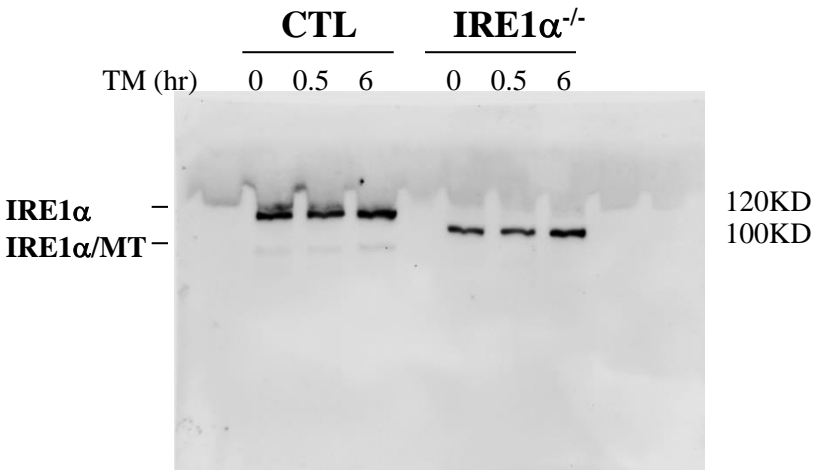

Supplement: emboj2013183df1.pdf [file emboj2013183df1.pdf]

**Figure 4A**

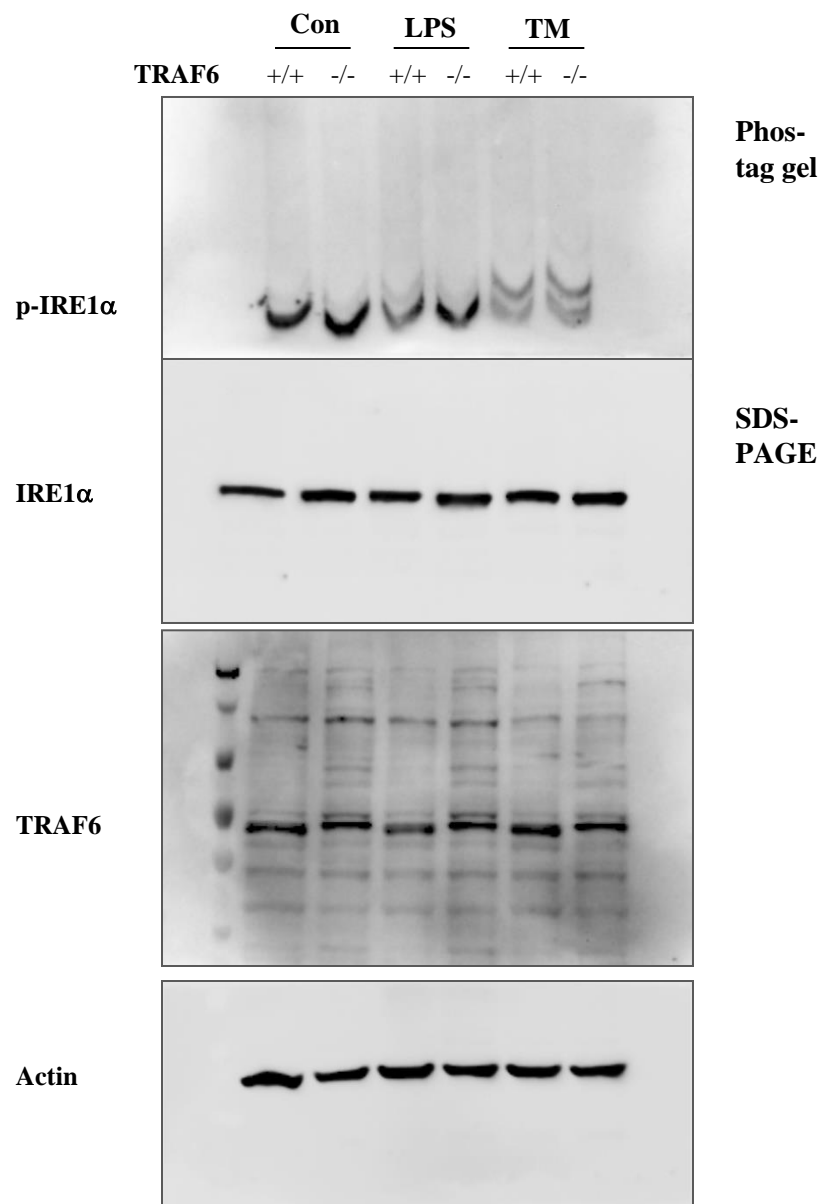

Supplement: emboj2013183df4.pdf [file emboj2013183df4.pdf]

**Figure 5A**

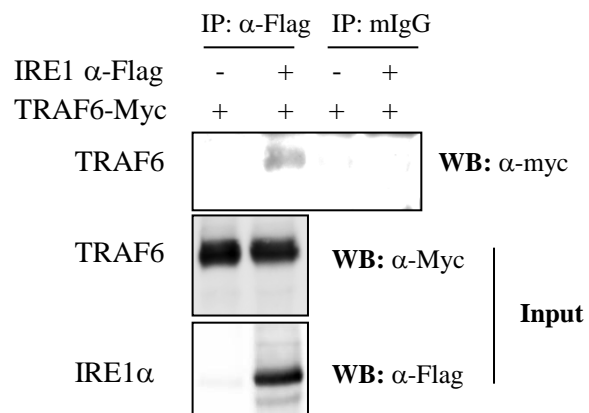

**Figure 5B**

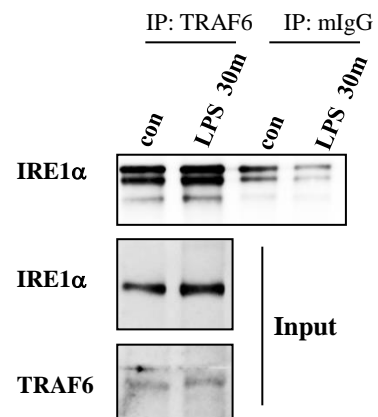

**Figure 5C**

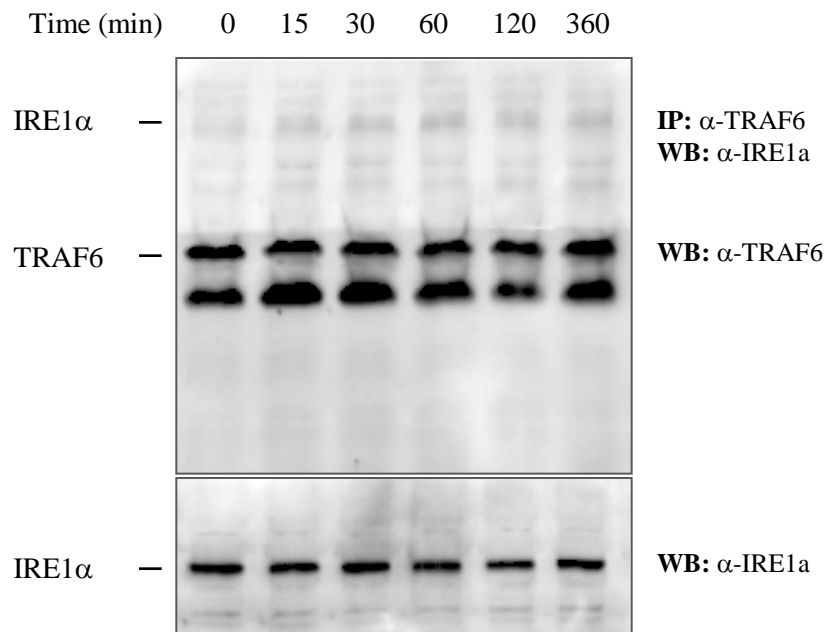

**Figure 5D**

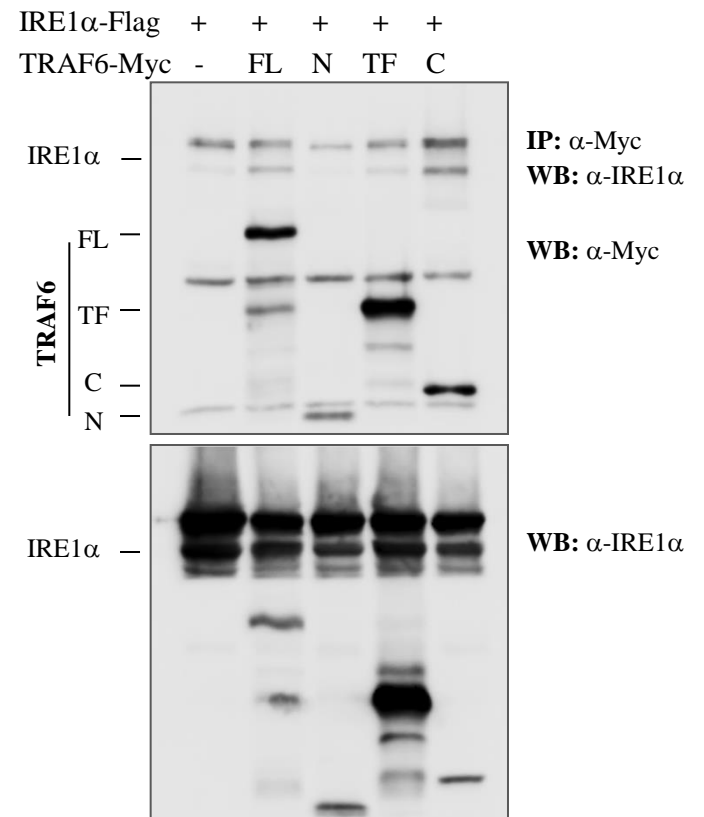

**Figure 5E**

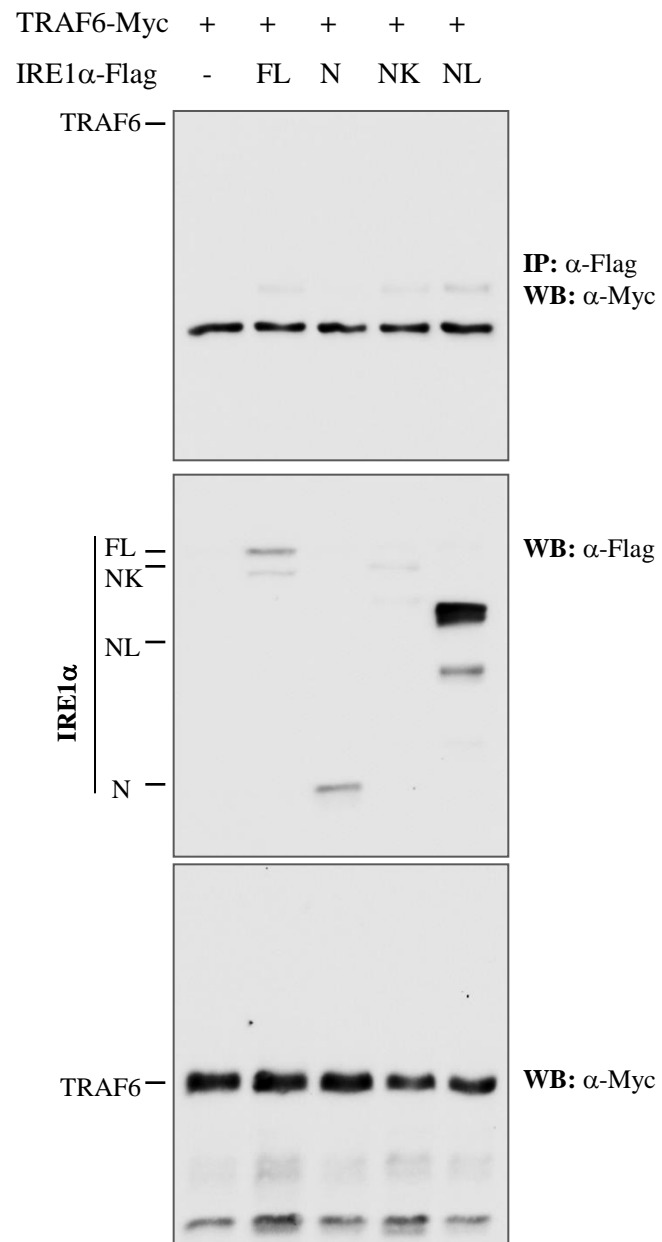

Supplement: emboj2013183df5.pdf [file emboj2013183df5.pdf]

**Figure 6A**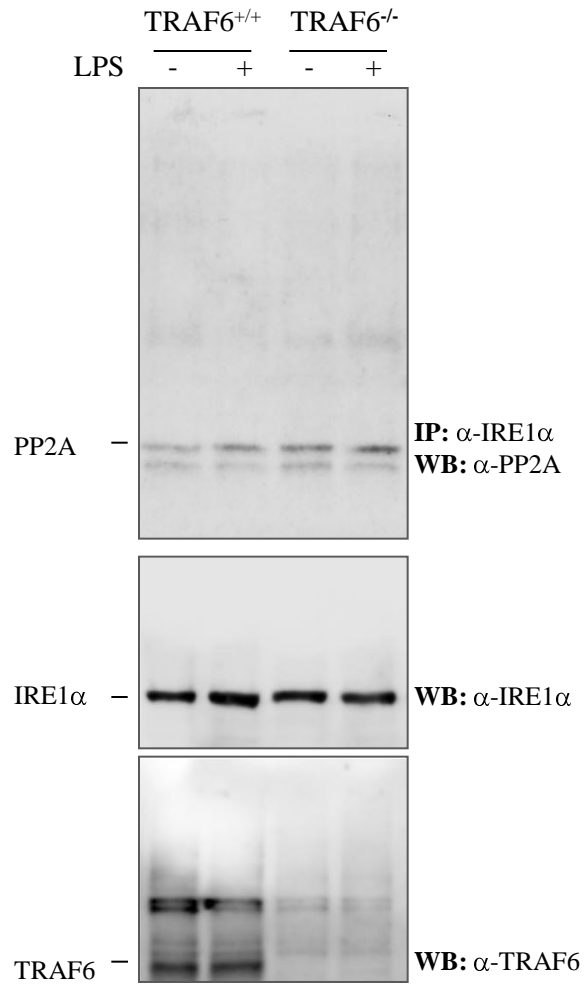**Figure 6C**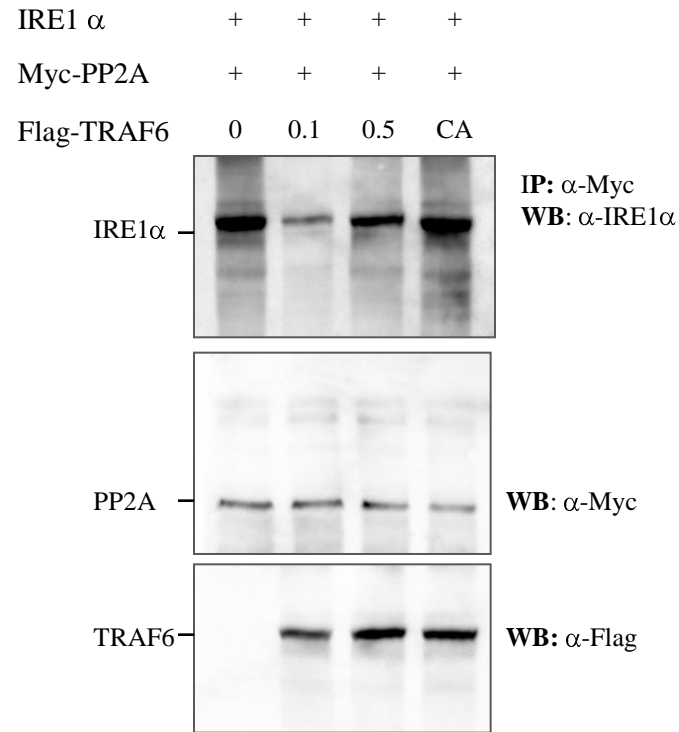**Figure 6D**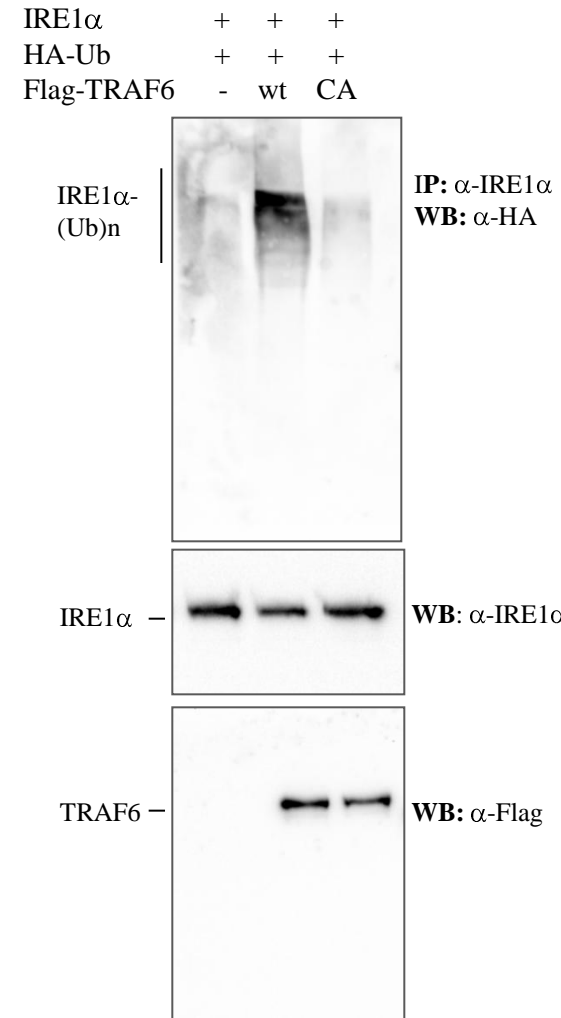

**Figure 6E**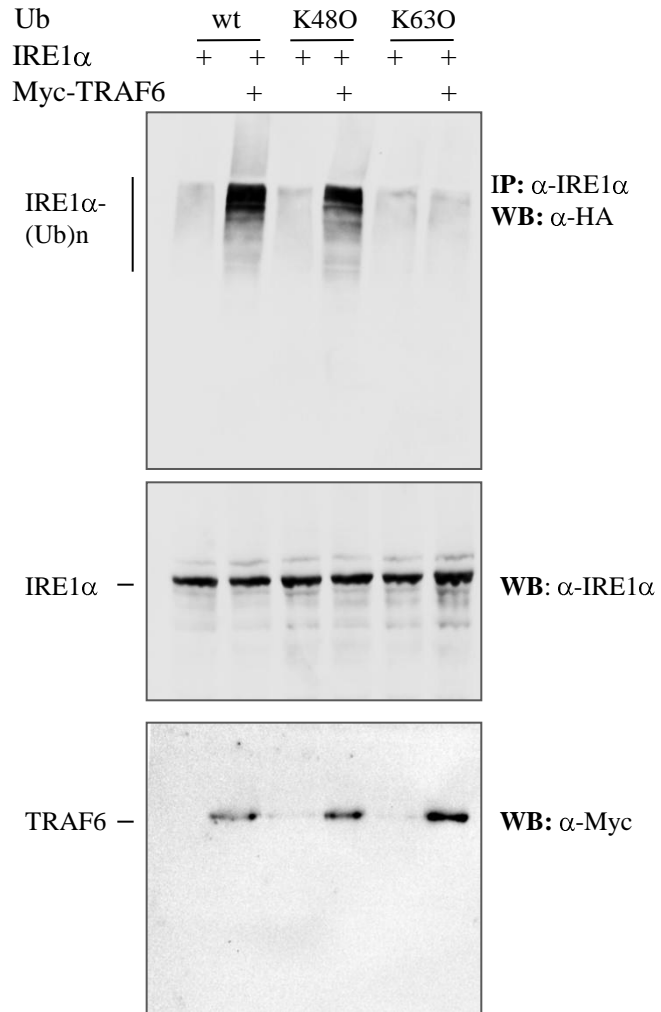**Figure 6F**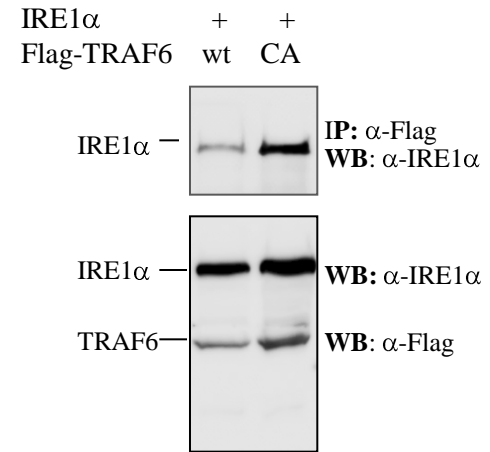

**Figure 6G**

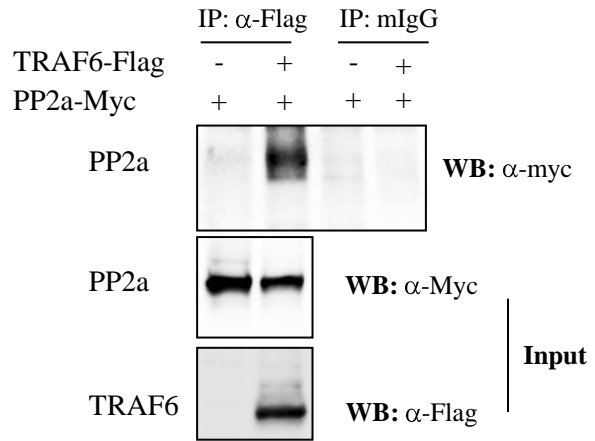

**Figure 6H**

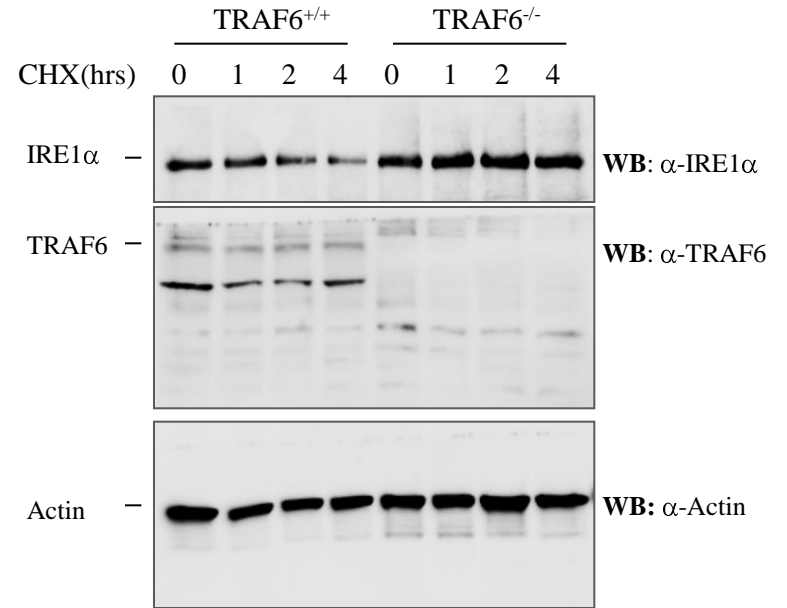

Supplement: emboj2013183df6.pdf [file emboj2013183df6.pdf]

# Supplemental Figure 15

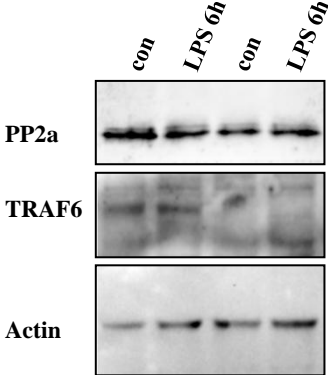

Supplement: emboj2013183dfs15.pdf [file emboj2013183dfs15.pdf]

# Supplemental Figure 2A

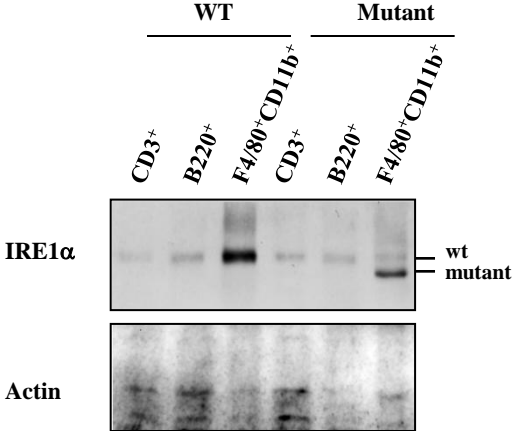

# Supplemental Figure 2B

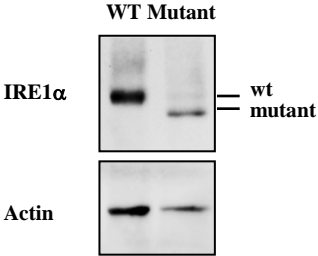

Supplement: emboj2013183dfs2.pdf [file emboj2013183dfs2.pdf]

# Supplemental Figure 8C

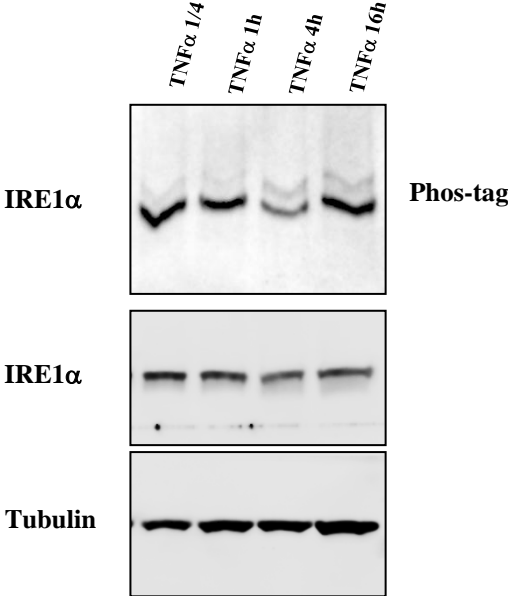

Supplement: emboj2013183dfs8.pdf [file emboj2013183dfs8.pdf]
